# Supplementary material for: RNA-Seq analysis of the multipartite genome of Rhizobium etli CE3 shows different replicon contributions under heat and saline shock
Source: PubMed Central journal article supplement (PMC4167512; doi:10.1186/1471-2164-15-770), 2014-09-08
Supplement: 12864_2014_6445_MOESM4_ESM.pdf [file 12864_2014_6445_MOESM4_ESM.pdf]

RpoH

SigA

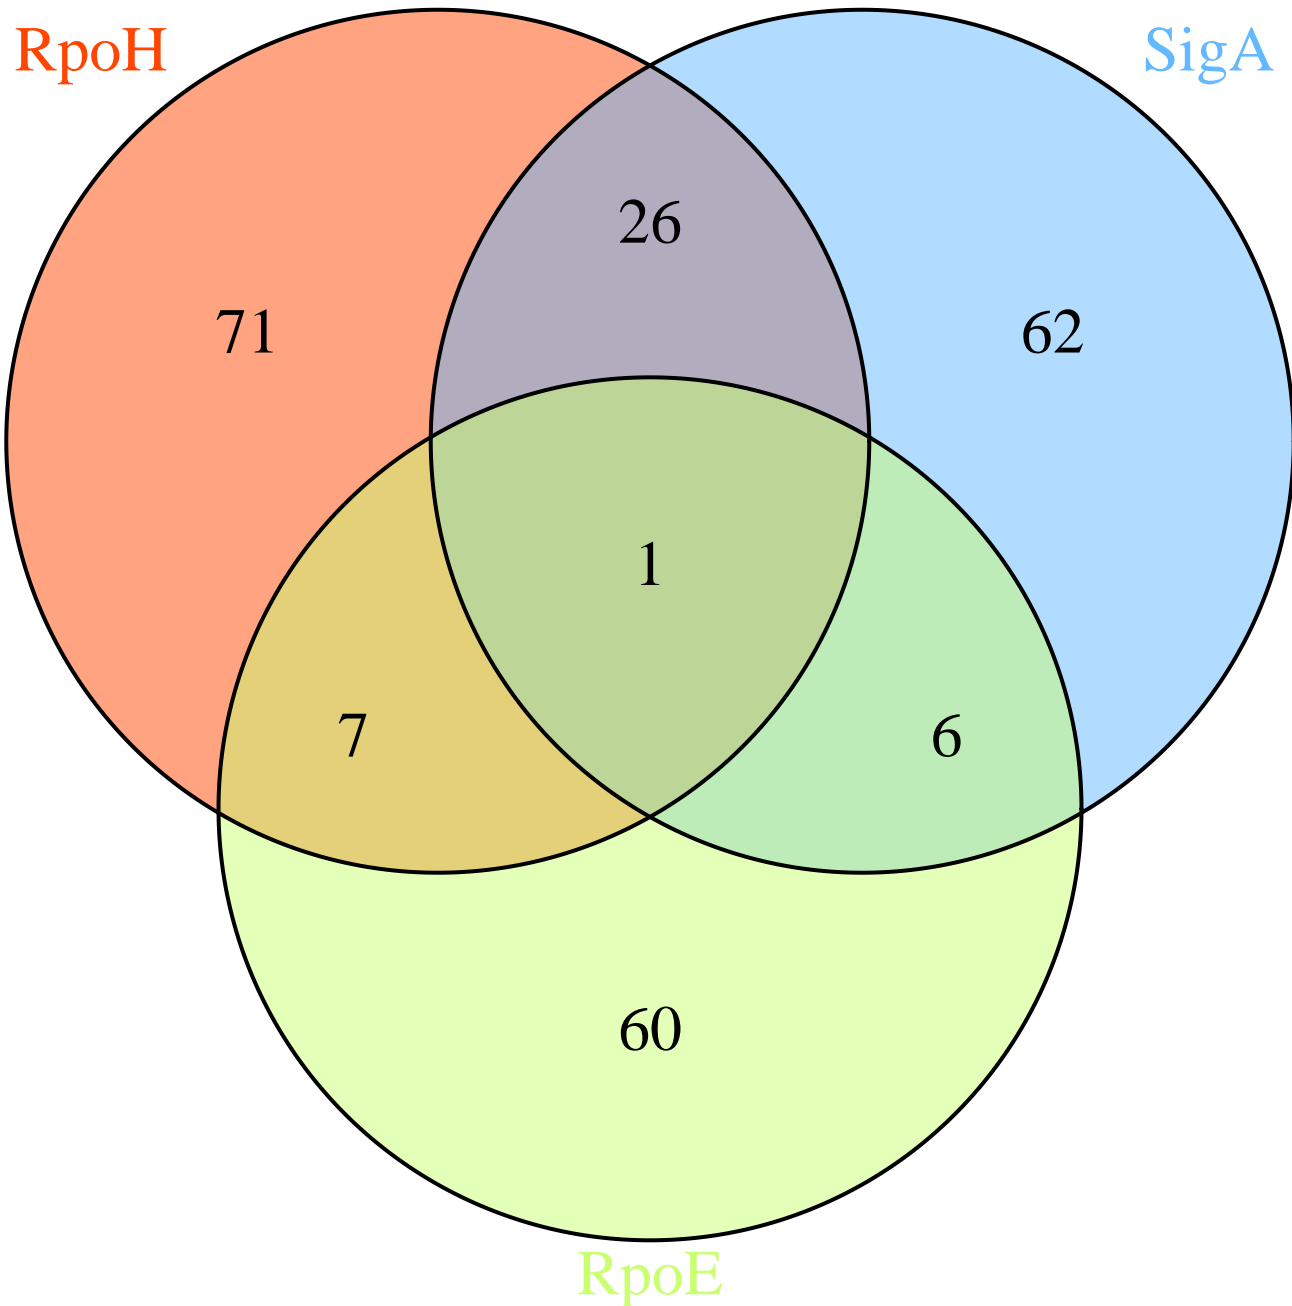

RpoE
